# Supplementary material for: Kremen1-induced cell death is regulated by homo- and heterodimerization
Source: PubMed Central journal article supplement (PMC6494814; doi:10.1038/s41420-019-0175-5), 2019-05-01
Supplement: 41420_2019_175_MOESM2_ESM.pdf [file 41420_2019_175_MOESM2_ESM.pdf]

| condition            | Fig 2B |            | Fig 2C |         | Fig 4B |         |          |          |            |
|----------------------|--------|------------|--------|---------|--------|---------|----------|----------|------------|
|                      | GFP    | Krm1secECD | Ctrl   | AP20187 | GFP    | Krm2    | Krm2ΔECD | Krm2ΔICD | Krm2secECD |
| number of cells      | 702    | 707        | 1014   | 909     | 1427   | 1660    | 1393     | 1076     | 732        |
| number of replicates | 4      | 4          | 8      | 8       | 11     | 10      | 9        | 6        | 4          |
| t-test p value       |        | 0.00006    |        | 0.00058 |        | 0.00000 | 0.03226  | 0.00002  | 0.00023    |
| Mann Whitney p value |        | 0.02860    |        | 0.00470 |        | <0.0001 | 0.13080  | 0.00020  | 0.00150    |

p < 0,001  
0,01 < p < 0,05  
p < 0,05
