# Supplementary material for: Kremen1-induced cell death is regulated by homo- and heterodimerization
Source: PubMed Central journal article supplement (PMC6494814; doi:10.1038/s41420-019-0175-5), 2019-05-01
Supplement: 41420_2019_175_MOESM3_ESM.pdf [file 41420_2019_175_MOESM3_ESM.pdf]

| Cancer type         | TCGA-BLCA   | TCGA-BRCA   | TCGA-CHOL  | TCGA-COAD   | TCGA-ESCA   | TCGA-HNSC   | TCGA-KICH   | TCGA-KIRC   | TCGA-KIRP   |
|---------------------|-------------|-------------|------------|-------------|-------------|-------------|-------------|-------------|-------------|
| Kremen1 p-value     | 0.332065582 | 8.66E-16    | 0.01953125 | 3.76E-05    | 0.174804688 | 0.000434366 | 0.001815677 | 1.62E-07    | 1.12E-05    |
| Dkk1 p-value        | 0.000335693 | 0.911038338 | 0.02734375 | 0.009382546 | 0.1015625   | 3.85E-06    | 0.006129205 | 0.730004798 | 0.002564962 |
| Kremen2 p-value     | 0.007144928 | 7.34E-19    | 0.00390625 | 9.15E-06    | 0.1015625   | 1.17E-06    | 0.00080812  | 3.87E-08    | 8.26E-06    |
| n                   | 19          | 113         | 9          | 26          | 11          | 43          | 25          | 72          | 32          |
| Kremen1 fold change | 0.96        | 0.54        | 2.32       | 0.55        | 0.43        | 0.67        | 1.77        | 0.65        | 0.43        |
| Dkk1 fold change    | 0.31        | 0.84        | 3.55       | 1.89        | 3.96        | 5.62        | 0.19        | 0.99        | 0.46        |
| Kremen2 fold change | 5.01        | 4.50        | 11.26      | 2.60        | 7.54        | 3.85        | 2.00        | 2.01        | 2.50        |

|                 |
|-----------------|
| p < 0,05        |
| 0,01 < p < 0,05 |
| p < 0,001       |

Significantly downregulated

Significantly upregulated

| TCGA-LIHC   | TCGA-LUAD   | TCGA-LUSC   | TCGA-PAAD | TCGA-PRAD   | TCGA-READ | TCGA-STAD   | TCGA-THCA   | TCGA-UCEC |
|-------------|-------------|-------------|-----------|-------------|-----------|-------------|-------------|-----------|
| 0.016231578 | 0.81632797  | 1.82E-09    | 0.875     | 0.047618825 | 0.15625   | 0.963233216 | 6.49E-06    | 0.8125    |
| 0.007454617 | 0.692946398 | 0.000832847 | 0.375     | 0.001704925 | 0.15625   | 0.119450366 | 0.002904423 | 0.15625   |
| 0.000235716 | 1.60E-10    | 7.14E-10    | 0.625     | 0.176254701 | 0.21875   | 8.19E-05    | 6.32E-09    | 1         |
| 50          | 58          | 51          | 4         | 52          | 6         | 32          | 59          | 7         |
| 1.43        | 0.96        | 3.02        | 1.07      | 0.88        | 1.82      | 0.94        | 0.77        | 0.30      |
| 2.01        | 0.71        | 2.66        | 64.44     | 0.44        | 24.82     | 2.25        | 1.43        | 2.59      |
| 1.90        | 3.38        | 34.89       | 1.38      | 0.63        | 2.15      | 3.37        | 2.25        | 1.36      |
