# Supplementary material for: Kremen1-induced cell death is regulated by homo- and heterodimerization
Source: PubMed Central journal article supplement (PMC6494814; doi:10.1038/s41420-019-0175-5), 2019-05-01
Supplement: 41420_2019_175_MOESM4_ESM.pdf [file 41420_2019_175_MOESM4_ESM.pdf]

|      |                                       |
|------|---------------------------------------|
| BLCA | Bladder Urothelial Carcinoma          |
| BRCA | Breast invasive carcinoma             |
| CHOL | Cholangiocarcinoma                    |
| COAD | Colon adenocarcinoma                  |
| ESCA | Esophageal carcinoma                  |
| HNSC | Head and Neck squamous cell carcinoma |
| KICH | Kidney Chromophobe                    |
| KIRC | Kidney renal clear cell carcinoma     |
| KIRP | Kidney renal papillary cell carcinoma |
| LIHC | Liver hepatocellular carcinoma        |
| LUAD | Lung adenocarcinoma                   |
| LUSC | Lung squamous cell carcinoma          |
| PAAD | Pancreatic adenocarcinoma             |
| PRAD | Prostate adenocarcinoma               |
| READ | Rectum adenocarcinoma                 |
| SARC | Sarcoma                               |
| STAD | Stomach adenocarcinoma                |
| THCA | Thyroid carcinoma                     |
| UCEC | Uterine Corpus Endometrial Carcinoma  |
