# Supplementary material for: Kremen1-induced cell death is regulated by homo- and heterodimerization
Source: PubMed Central journal article supplement (PMC6494814; doi:10.1038/s41420-019-0175-5), 2019-05-01
Supplement: 41420_2019_175_MOESM5_ESM.pdf [file 41420_2019_175_MOESM5_ESM.pdf]

|           | logFC | FDR      | Normal | Tumor   | Delta  |
|-----------|-------|----------|--------|---------|--------|
| KRT17     | 6.82  | 2.75E-39 | 263.2  | 27562.8 | 1795.4 |
| TOP2A     | 4.67  | 3.03E-73 | 119.1  | 2603.9  | 555.9  |
| TP63      | 5.76  | 1.38E-40 | 82.4   | 4128.5  | 474.8  |
| EEF1A2    | 4.81  | 2.13E-39 | 83.6   | 1964.1  | 402.6  |
| MMP11     | 5.03  | 7.94E-74 | 75.5   | 2252.2  | 379.5  |
| FOXM1     | 4.68  | 6.18E-94 | 62.6   | 1361.9  | 293.1  |
| PI3       | 6.58  | 1.86E-39 | 40.7   | 3332.6  | 267.9  |
| NPTX2     | 5.04  | 3.69E-41 | 49.6   | 1040.6  | 249.9  |
| LYPD3     | 5.31  | 3.78E-54 | 43.5   | 1635.8  | 231.1  |
| MYBL2     | 4.84  | 4.22E-70 | 40.9   | 1021.3  | 198.0  |
| CA9       | 5.81  | 4.62E-39 | 32.5   | 1080.9  | 188.6  |
| CDC20     | 4.60  | 1.30E-80 | 37.9   | 805.9   | 174.3  |
| PTHLH     | 6.20  | 3.16E-57 | 21.8   | 1324.4  | 135.2  |
| UBE2C     | 4.85  | 8.41E-95 | 27.8   | 666.7   | 134.6  |
| IGF2BP3   | 4.85  | 1.99E-82 | 21.4   | 514.7   | 103.8  |
| SRRM3     | 4.93  | 2.74E-62 | 20.4   | 548.5   | 100.4  |
| KIF4A     | 4.72  | 1.98E-95 | 20.1   | 456.1   | 94.7   |
| BIRC5     | 4.76  | 3.91E-83 | 18.7   | 439.2   | 89.1   |
| COL11A1   | 6.28  | 1.08E-38 | 14.2   | 1024.2  | 89.0   |
| ATP1A3    | 6.54  | 1.45E-45 | 13.4   | 1055.9  | 87.8   |
| KIF1A     | 5.63  | 5.90E-48 | 14.1   | 548.7   | 79.4   |
| HJURP     | 4.69  | 6.28E-84 | 15.8   | 339.8   | 74.2   |
| MELK      | 4.81  | 3.17E-80 | 15.0   | 365.5   | 72.4   |
| HCN2      | 5.57  | 2.20E-48 | 12.6   | 568.1   | 70.3   |
| DLGAP5    | 4.75  | 1.57E-69 | 14.7   | 349.8   | 70.1   |
| FAM83A    | 6.32  | 5.28E-40 | 10.8   | 735.9   | 68.5   |
| NEK2      | 4.74  | 1.34E-88 | 14.4   | 321.5   | 68.1   |
| TROAP     | 4.83  | 1.26E-95 | 13.5   | 322.0   | 65.1   |
| CDC45     | 4.77  | 1.42E-76 | 13.5   | 302.5   | 64.5   |
| KIF18B    | 4.92  | 2.50E-84 | 12.7   | 320.3   | 62.6   |
| TGM3      | 5.34  | 1.89E-41 | 11.6   | 462.7   | 61.9   |
| NXPH4     | 5.63  | 2.10E-76 | 10.6   | 501.5   | 59.8   |
| NUF2      | 4.66  | 7.85E-74 | 12.0   | 270.7   | 55.9   |
| DEPDC1    | 4.60  | 1.03E-80 | 12.1   | 247.7   | 55.4   |
| TTK       | 4.87  | 4.71E-80 | 11.3   | 294.6   | 55.2   |
| PITX1     | 6.31  | 7.62E-53 | 8.6    | 636.6   | 54.5   |
| KIF14     | 4.61  | 5.98E-93 | 11.6   | 224.9   | 53.7   |
| CABYR     | 4.68  | 4.58E-65 | 11.0   | 254.8   | 51.7   |
| GRHL3     | 4.58  | 3.99E-38 | 11.0   | 237.7   | 50.3   |
| EXO1      | 4.60  | 9.66E-83 | 9.8    | 203.2   | 45.1   |
| PPP2R2C   | 6.21  | 7.04E-54 | 7.1    | 499.9   | 44.2   |
| GJB5      | 5.28  | 6.83E-42 | 8.3    | 288.7   | 43.7   |
| PRAME     | 6.82  | 2.62E-44 | 6.2    | 662.1   | 42.0   |
| AFAP1-AS1 | 5.59  | 2.02E-43 | 7.4    | 327.7   | 41.4   |
| E2F7      | 4.65  | 1.11E-64 | 8.4    | 185.0   | 38.9   |
| B4GALNT4  | 6.14  | 1.63E-52 | 5.8    | 342.6   | 35.7   |
| CENPA     | 4.82  | 6.19E-87 | 6.2    | 150.9   | 30.0   |
| GJB6      | 8.39  | 6.86E-44 | 3.5    | 1068.5  | 29.1   |
| CST1      | 7.75  | 1.41E-39 | 3.4    | 643.0   | 26.4   |
| HMGA2     | 7.25  | 2.75E-52 | 3.2    | 458.2   | 22.9   |

|                |             |                 |            |              |             |
|----------------|-------------|-----------------|------------|--------------|-------------|
| RNASE7         | 5.50        | 1.08E-53        | 4.0        | 130.4        | 22.2        |
| CDC25C         | 4.94        | 2.68E-97        | 4.0        | 106.8        | 19.9        |
| DLX5           | 6.32        | 1.02E-43        | 3.1        | 230.1        | 19.4        |
| ZIC2           | 5.37        | 1.50E-43        | 3.3        | 132.0        | 17.5        |
| OTX1           | 5.01        | 1.46E-39        | 3.5        | 102.3        | 17.4        |
| BARX1          | 5.99        | 3.95E-38        | 2.3        | 87.0         | 13.7        |
| MLANA          | 5.34        | 1.75E-38        | 2.5        | 101.3        | 13.3        |
| NEIL3          | 4.58        | 1.26E-72        | 2.9        | 62.3         | 13.2        |
| KLK4           | 8.82        | 2.09E-40        | 1.4        | 645.2        | 12.7        |
| FAM83C         | 7.22        | 6.77E-44        | 1.5        | 178.3        | 11.2        |
| <b>KREMEN2</b> | <b>7.04</b> | <b>3.42E-64</b> | <b>1.6</b> | <b>186.0</b> | <b>11.1</b> |
| KCNN1          | 5.33        | 8.11E-46        | 1.9        | 67.8         | 10.4        |
| SHOX2          | 5.35        | 2.77E-53        | 1.8        | 63.8         | 9.5         |
| CERS3          | 7.95        | 9.12E-43        | 1.1        | 241.5        | 8.4         |
| PNMA5          | 7.30        | 5.41E-39        | 1.1        | 158.4        | 8.2         |
| HHIPL2         | 6.70        | 2.82E-41        | 1.2        | 148.8        | 8.2         |
| SLC39A2        | 4.66        | 6.83E-42        | 1.7        | 34.4         | 8.1         |
| MAGEA6         | 9.09        | 3.82E-38        | 0.8        | 406.1        | 7.5         |
| FOXH1          | 4.84        | 3.27E-49        | 1.3        | 40.3         | 6.5         |
| ZNF695         | 4.64        | 4.61E-49        | 1.4        | 32.6         | 6.4         |
| C1orf61        | 5.25        | 1.49E-45        | 1.2        | 36.8         | 6.1         |
| DQX1           | 5.76        | 3.41E-42        | 1.1        | 54.5         | 6.1         |
| SMC1B          | 4.94        | 1.36E-51        | 1.0        | 26.4         | 4.9         |
| LINC00669      | 4.87        | 3.46E-56        | 0.9        | 23.3         | 4.2         |
| DLX6           | 7.56        | 1.26E-39        | 0.5        | 99.5         | 3.7         |
| HOXA13         | 6.26        | 6.35E-67        | 0.6        | 45.5         | 3.5         |
| C5orf46        | 5.48        | 7.88E-57        | 0.6        | 23.7         | 3.2         |
| HOXC13         | 6.84        | 5.83E-42        | 0.4        | 54.6         | 2.8         |
| EN1            | 6.97        | 6.78E-42        | 0.4        | 49.8         | 2.7         |
| DLX1           | 6.02        | 1.44E-51        | 0.4        | 26.4         | 2.5         |
| GABRA3         | 6.87        | 1.20E-40        | 0.3        | 46.6         | 2.3         |
| TERT           | 6.88        | 3.76E-49        | 0.2        | 37.9         | 1.6         |
| DLX2           | 5.51        | 1.77E-40        | 0.2        | 13.1         | 1.3         |
| DMBX1          | 6.46        | 3.34E-38        | 0.1        | 18.2         | 0.9         |
| MAGEA3.1       | 9.09        | 3.82E-38 NA     | NA         | NA           |             |
