# Supplementary material for: Kremen1-induced cell death is regulated by homo- and heterodimerization
Source: PubMed Central journal article supplement (PMC6494814; doi:10.1038/s41420-019-0175-5), 2019-05-01
Supplement: 41420_2019_175_MOESM6_ESM.pdf [file 41420_2019_175_MOESM6_ESM.pdf]

|         | logFC | FDR       | Normal | Tumor  | Delta  |
|---------|-------|-----------|--------|--------|--------|
| SLC2A1  | 3.00  | 2.85E-58  | 1138.7 | 8475.3 | 3421.1 |
| TOP2A   | 3.35  | 3.47E-75  | 298.7  | 2701.8 | 1000.5 |
| MMP11   | 3.30  | 1.89E-49  | 301.7  | 3005.8 | 996.6  |
| TPX2    | 3.30  | 1.91E-91  | 188.1  | 1565.6 | 621.1  |
| CENPF   | 3.22  | 1.62E-82  | 175.9  | 1476.6 | 567.4  |
| MMP1    | 4.80  | 3.55E-58  | 100.8  | 2545.9 | 483.7  |
| FOXM1   | 3.31  | 3.21E-85  | 140.5  | 1244.3 | 465.2  |
| MYBL2   | 3.07  | 7.54E-51  | 145.9  | 1095.9 | 447.7  |
| ANLN    | 2.92  | 9.23E-58  | 146.1  | 960.8  | 426.7  |
| ETV4    | 3.28  | 7.71E-85  | 88.5   | 765.7  | 290.4  |
| UBE2C   | 3.27  | 3.87E-67  | 86.2   | 724.6  | 282.0  |
| PMEL    | 3.44  | 1.80E-51  | 81.5   | 843.7  | 280.7  |
| NPTX2   | 4.17  | 6.94E-59  | 62.4   | 908.0  | 260.4  |
| COL10A1 | 3.69  | 1.13E-45  | 67.8   | 868.3  | 249.9  |
| IQGAP3  | 3.07  | 5.54E-69  | 74.3   | 551.4  | 227.8  |
| ASPM    | 3.35  | 6.90E-81  | 66.2   | 597.0  | 221.7  |
| CEP55   | 2.92  | 2.68E-58  | 70.7   | 471.8  | 206.4  |
| KIF2C   | 3.00  | 1.06E-70  | 68.7   | 495.6  | 206.2  |
| CDC6    | 3.06  | 2.99E-89  | 67.4   | 497.3  | 206.2  |
| KIF20A  | 2.98  | 7.19E-67  | 64.9   | 461.3  | 193.7  |
| COL11A1 | 5.14  | 2.59E-55  | 37.5   | 1328.0 | 192.6  |
| TRIP13  | 2.99  | 1.69E-78  | 61.5   | 446.9  | 184.0  |
| FBN2    | 3.44  | 1.94E-49  | 52.9   | 558.9  | 182.0  |
| BIRC5   | 3.01  | 1.41E-58  | 55.9   | 391.6  | 168.4  |
| BUB1B   | 2.95  | 1.97E-69  | 54.6   | 380.5  | 161.2  |
| KIF4A   | 3.35  | 9.70E-84  | 47.1   | 433.4  | 157.8  |
| NCAPH   | 2.92  | 5.65E-69  | 51.6   | 350.8  | 151.0  |
| DLGAP5  | 3.01  | 1.64E-53  | 47.7   | 341.9  | 143.5  |
| PKMYT1  | 2.92  | 3.81E-65  | 47.9   | 314.7  | 140.0  |
| MELK    | 3.22  | 1.39E-66  | 43.2   | 355.2  | 139.0  |
| NXPH4   | 3.17  | 5.03E-47  | 40.6   | 354.5  | 128.6  |
| CDKN2A  | 3.86  | 3.60E-101 | 32.3   | 410.7  | 124.6  |
| HJURP   | 3.32  | 8.47E-79  | 37.3   | 331.5  | 123.8  |
| NEK2    | 3.33  | 1.84E-74  | 36.7   | 328.2  | 122.2  |
| TTK     | 3.10  | 2.86E-66  | 37.8   | 287.9  | 117.1  |
| IGF2BP3 | 4.07  | 2.07E-96  | 28.7   | 423.2  | 116.7  |
| GTSE1   | 2.95  | 4.27E-73  | 36.9   | 253.7  | 108.5  |
| TROAP   | 3.29  | 4.42E-76  | 32.9   | 283.5  | 108.2  |
| KIF18B  | 3.43  | 5.85E-74  | 31.3   | 296.8  | 107.4  |
| CDC45   | 3.19  | 2.91E-64  | 32.5   | 258.9  | 103.8  |
| NUF2    | 3.31  | 5.73E-74  | 29.7   | 262.8  | 98.4   |
| PRAME   | 5.23  | 2.19E-48  | 18.0   | 681.5  | 94.0   |
| GRIN2D  | 2.98  | 8.23E-59  | 29.9   | 208.9  | 88.9   |
| TICRR   | 2.99  | 7.36E-67  | 29.0   | 202.7  | 86.7   |
| CKAP2L  | 3.04  | 3.43E-70  | 28.0   | 201.9  | 84.9   |
| KIF14   | 3.50  | 1.81E-88  | 22.5   | 225.0  | 78.7   |
| CDCA2   | 2.99  | 3.14E-64  | 26.1   | 183.5  | 78.1   |
| CABYR   | 3.18  | 1.40E-60  | 24.5   | 217.0  | 77.7   |
| MCM10   | 3.24  | 4.78E-74  | 23.9   | 198.4  | 77.5   |
| EXO1    | 3.31  | 1.83E-82  | 22.7   | 200.9  | 75.0   |

|                |             |                 |            |              |             |
|----------------|-------------|-----------------|------------|--------------|-------------|
| RAD54L         | 3.04        | 5.33E-78        | 24.3       | 179.4        | 74.0        |
| POLQ           | 3.17        | 5.65E-72        | 22.5       | 179.5        | 71.4        |
| MMP13          | 6.75        | 6.84E-52        | 10.3       | 1140.1       | 69.4        |
| HCN2           | 4.37        | 4.29E-65        | 14.9       | 276.4        | 65.0        |
| E2F7           | 3.44        | 9.87E-77        | 17.5       | 170.7        | 60.2        |
| CENPA          | 3.21        | 2.81E-69        | 18.0       | 147.6        | 57.6        |
| HMG2           | 4.89        | 8.65E-64        | 11.1       | 317.4        | 54.4        |
| CDC25C         | 2.97        | 1.14E-58        | 12.9       | 92.0         | 38.4        |
| <b>KREMEN2</b> | <b>4.17</b> | <b>6.16E-58</b> | <b>8.2</b> | <b>132.6</b> | <b>34.3</b> |
| OTX1           | 3.64        | 7.88E-50        | 8.4        | 90.7         | 30.6        |
| CENPI          | 3.02        | 6.90E-68        | 9.0        | 66.7         | 27.2        |
| ZIC2           | 4.20        | 4.32E-48        | 6.5        | 107.6        | 27.2        |
| NEIL3          | 2.93        | 3.31E-54        | 8.3        | 57.0         | 24.4        |
| SLC30A3        | 3.62        | 4.60E-51        | 4.5        | 56.3         | 16.2        |
| KCNN1          | 3.51        | 1.81E-50        | 3.7        | 38.4         | 13.1        |
| ZNF695         | 3.35        | 5.55E-66        | 3.8        | 36.9         | 12.9        |
| GRM4           | 5.19        | 8.52E-62        | 2.4        | 80.4         | 12.4        |
| PNMA5          | 6.71        | 1.00E-64        | 1.4        | 153.7        | 9.4         |
| SMC1B          | 4.53        | 6.24E-77        | 1.6        | 35.8         | 7.4         |
| DLL3           | 4.40        | 2.49E-46        | 1.5        | 30.4         | 6.6         |
| TERT           | 5.23        | 3.89E-49        | 1.2        | 48.0         | 6.4         |
| DPF1           | 3.29        | 1.99E-48        | 1.8        | 16.6         | 6.0         |
| TCAM1P         | 4.06        | 8.42E-46        | 1.1        | 17.6         | 4.3         |
| PLAC1          | 3.76        | 1.71E-48        | 1.1        | 14.3         | 4.3         |
| DMBX1          | 5.20        | 4.03E-54        | 0.7        | 26.7         | 3.4         |
| FEZF1          | 4.95        | 2.47E-47        | 0.6        | 19.6         | 3.1         |
| KISS1R         | 4.21        | 1.65E-61        | 0.7        | 12.7         | 2.8         |
| TEX19          | 5.16        | 6.25E-57        | 0.4        | 16.0         | 2.2         |
| GNGT1          | 3.89        | 9.22E-46        | 0.3        | 6.0          | 1.4         |
| GBX2           | 3.85        | 1.20E-45        | 0.3        | 5.0          | 1.1         |
